# Supplementary material for: Development of an internally controlled quantitative PCR to measure total cell-associated HIV-1 DNA in blood
Source: publisher site journal article supplement (doi:10.1515/cclm-2017-0587), 2017-09-15
Supplement: Supplementary file 2 [file cclm-2017-0587_suppl.docx]

**Supplemental Figure 1**: Inter-assay precision of standard curves. Serial dilutions of pNL4-3 and human DNA were used in the IC-qPCR assay to detect the total HIV-1 DNA and the beta globin DNA, respectively.





**Supplemental Figure 2**: Intra assay precision of the standard curve generated from serial dilutions of pNL4-3 DNA; each point was tested in 5 replicates.





**Supplemental Figure 3**: Precision of IC-qPCR on clinical samples. Samples were tested in 5 replicates for intra-run experiments and in 5 consecutive runs to determine the inter-run reproducibility.





Supplemental Table 1: Sensitivity of IC-qPCR on serial dilutions of pNL4-3 DNA analysed in 20 consecutive runs.

| pNL4-3 copies | Number Tested | Number Detected | Percent Detected |
| --- | --- | --- | --- |
| 80 | 20 | 20 | 100 |
| 40 | 20 | 20 | 100 |
| 20 | 20 | 20 | 100 |
| 10 | 20 | 19 | 95 |
| 5 | 20 | 13 | 65 |
| 2.5 | 20 | 13 | 65 |
